# Supplementary material for: Simultaneous oral and inhalational intake of molecular hydrogen additively suppresses signaling pathways in rodents
Source: Springer Nature journal article supplement (doi:10.1007/s11010-015-2353-y), 2015-02-23
Supplement: 11010_2015_2353_MOESM1_ESM.pdf [file 11010_2015_2353_MOESM1_ESM.pdf]

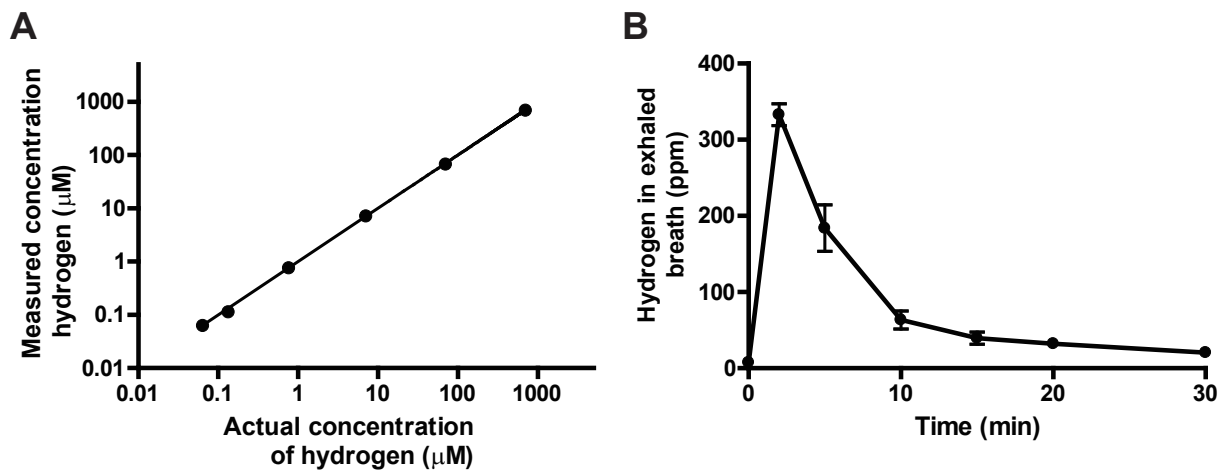

**Supplemental Fig. 1**

**Measurement of H<sub>2</sub> concentration using gas chromatography.** (A) Following gradual dilution of H<sub>2</sub>-saturated water, the actual H<sub>2</sub>-concentrations in these waters were measured using gas chromatography. (B) After oral administration of H<sub>2</sub> rich water, H<sub>2</sub> concentrations in the exhaled gas were sequentially measured.

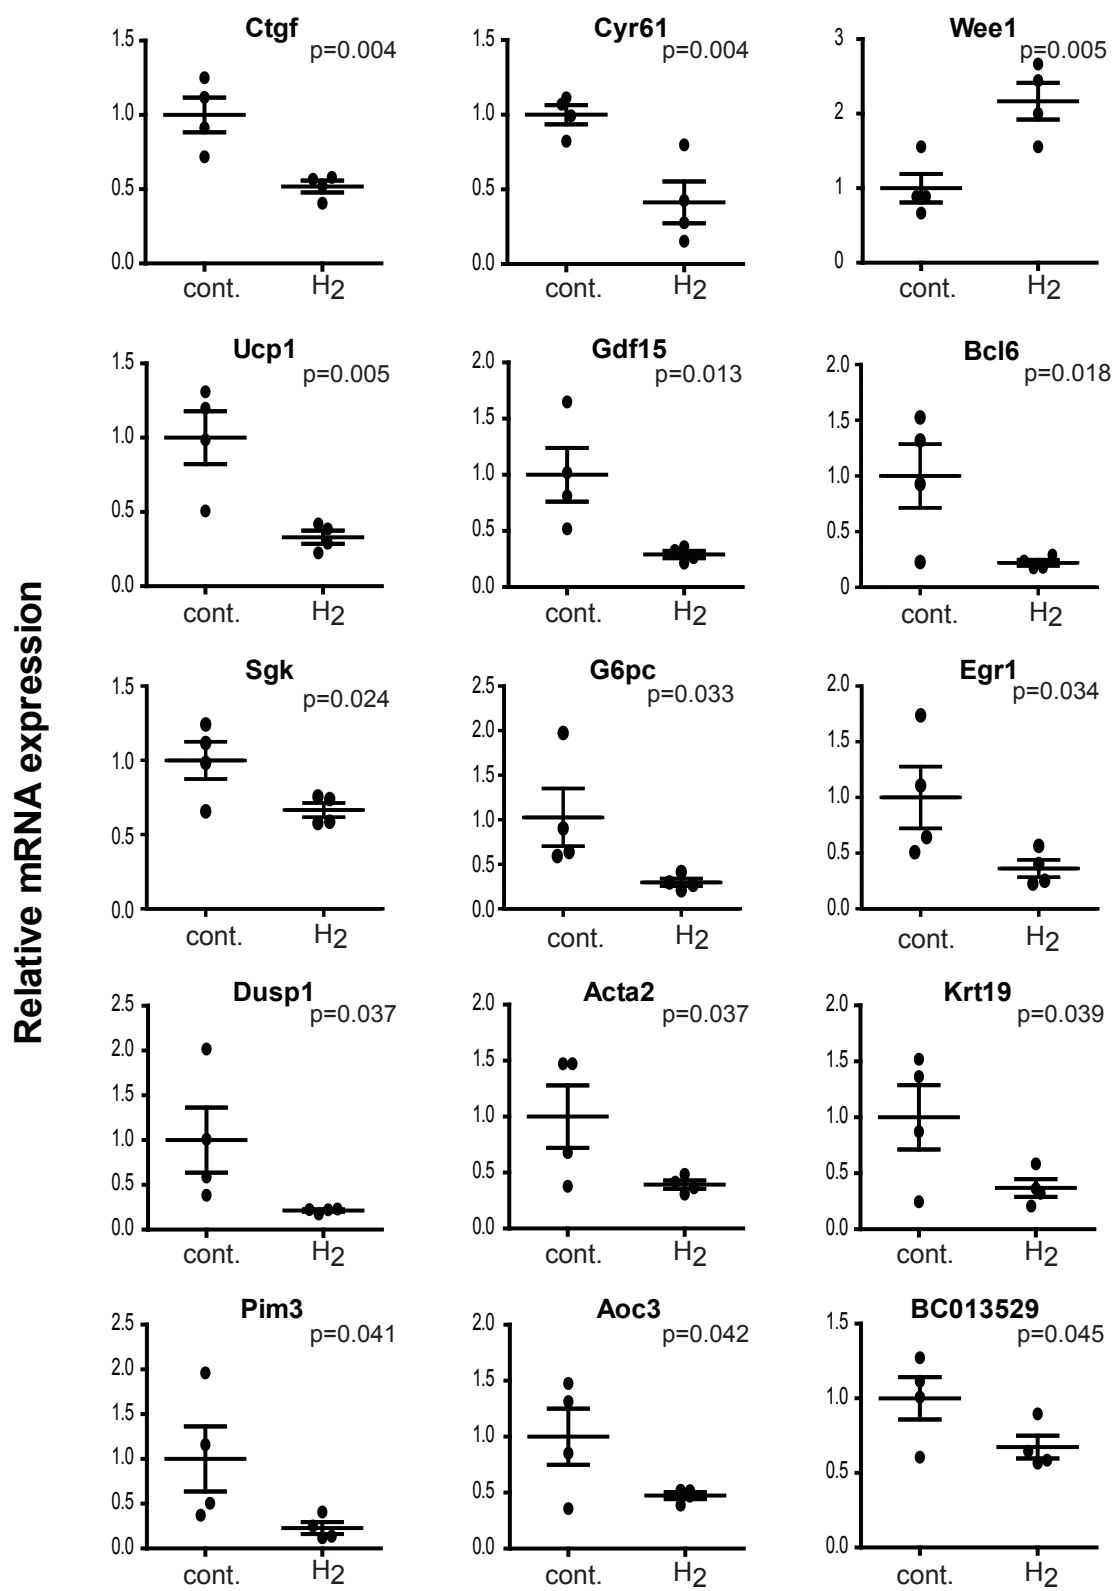

**Supplemental Fig. 2**  
**Relative gene expression for genes showing statistically significant up- or down-regulation after H2 administration.**

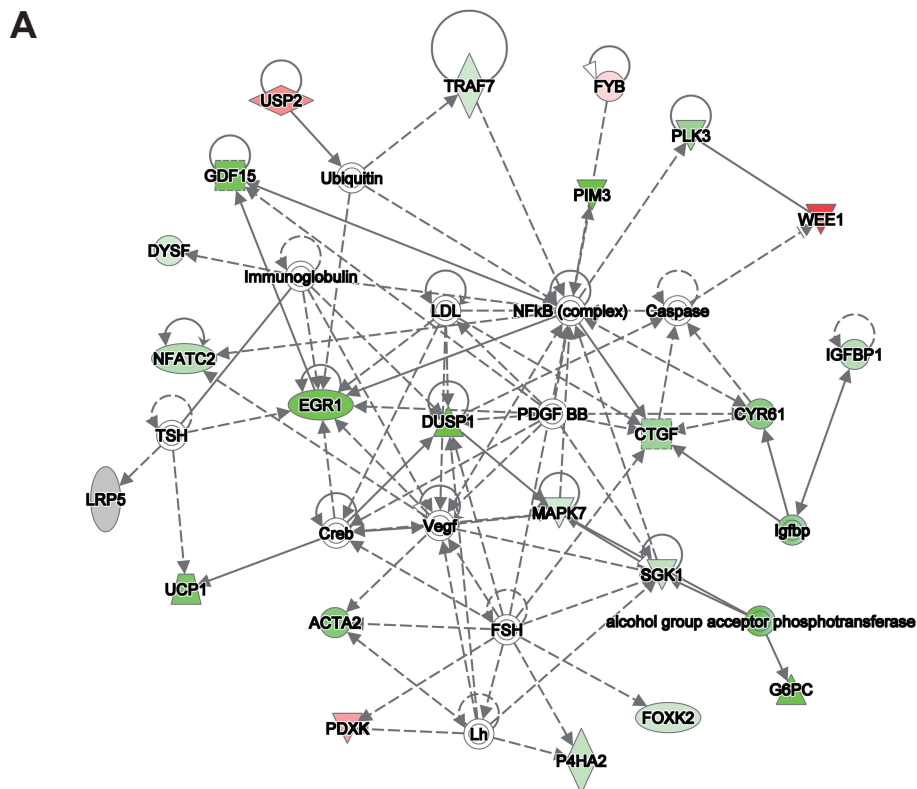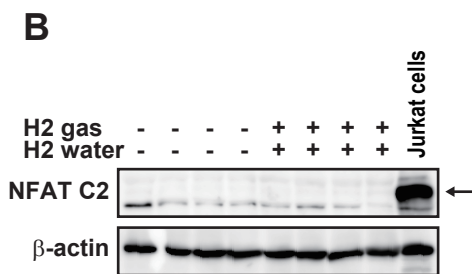

**Supplemental Fig. 3.**

**Ingenuity Pathway Analysis based on actual gene expression levels determined by qPCR, and NFAT expression in liver with or without H2 administration.**

(A) Actual gene expression levels determined by qPCR in Table S1 were analyzed using Ingenuity Pathway Analysis (IPA) software (Ingenuity Systems), and the network was graphically generated. Green (down-regulated genes) and red (up-regulated genes) nodes indicate input genes. The biological relationship between two nodes is represented as a line. Bold lines indicate a direct interaction, and dotted lines indicate an indirect interaction. (B) Liver lysates were subjected to western blot analysis for NFAT C2 expression with or without H2 administration. Lysate from Jurkat cells was used as positive control.

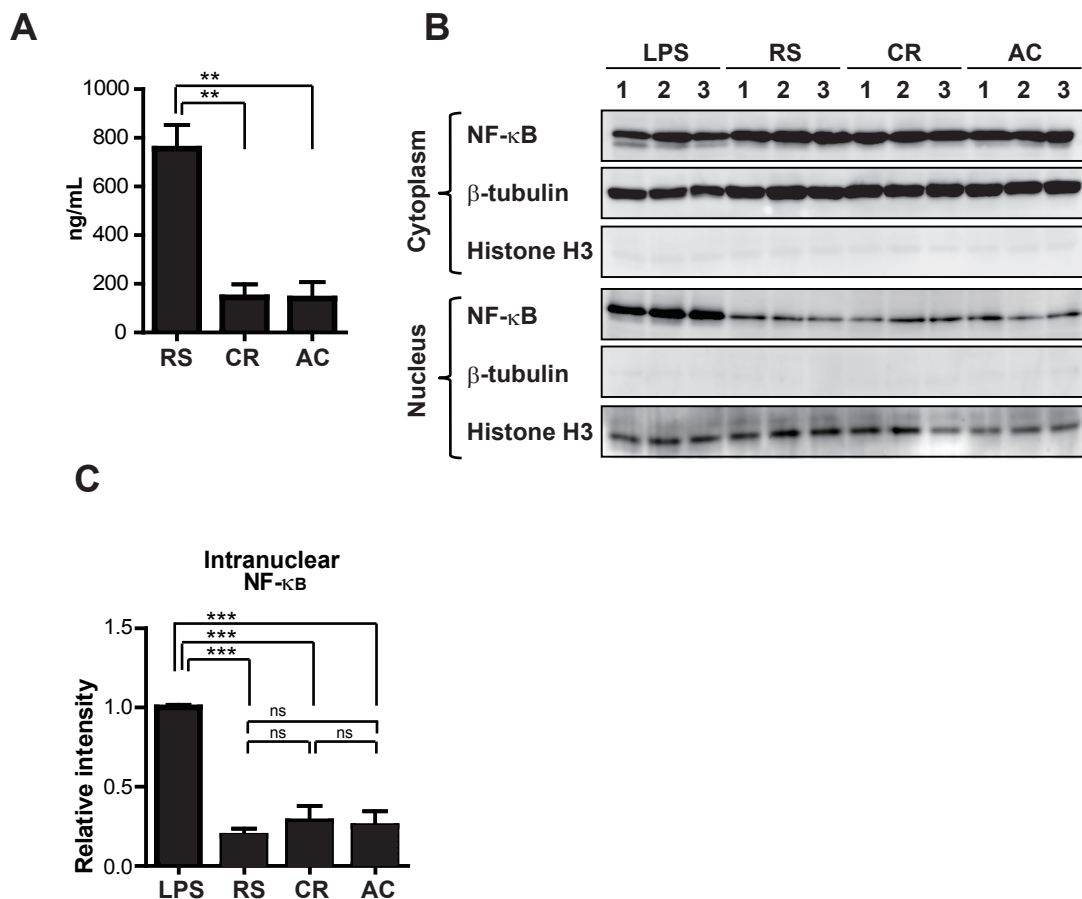

**Supplemental Fig. 4.**

**Stress hormone levels and NF-κB activation in mice housed in air-tight chambers used for continuous hydrogen gas treatment.** (A) Serum corticosterone was measured using ELISAs (Corticosterone EIA, Yanaihara Institute Inc., Fujinomiya, Japan) in mice housed for 3 weeks in a conventional specific-pathogen-free rack of cages or in air-tight chambers supplied with 10 L/min air without H<sub>2</sub>, as well as in mice under 20-hour restraint stress. (B) Cytosolic and nuclear proteins were subjected to western blot analysis for the indicated proteins from mouse livers in four different conditions (n=4 per condition). (C) Band intensities for intranuclear NF-κB were quantified. RS, mice under restraint stress for 20 hours (positive control for serum corticosterone); CR, mice in a conventional clean rack; AC, mice in an air-tight chamber for continuous H<sub>2</sub> gas treatment; LPS, mice after peritoneal injection of LPS (positive control for NF-κB activation). Asterisks indicate statistical significance as determined by one-way ANOVA and Tukey's multiple-comparison test (\*\*p < 0.01, \*\*\*p < 0.001).

**A**

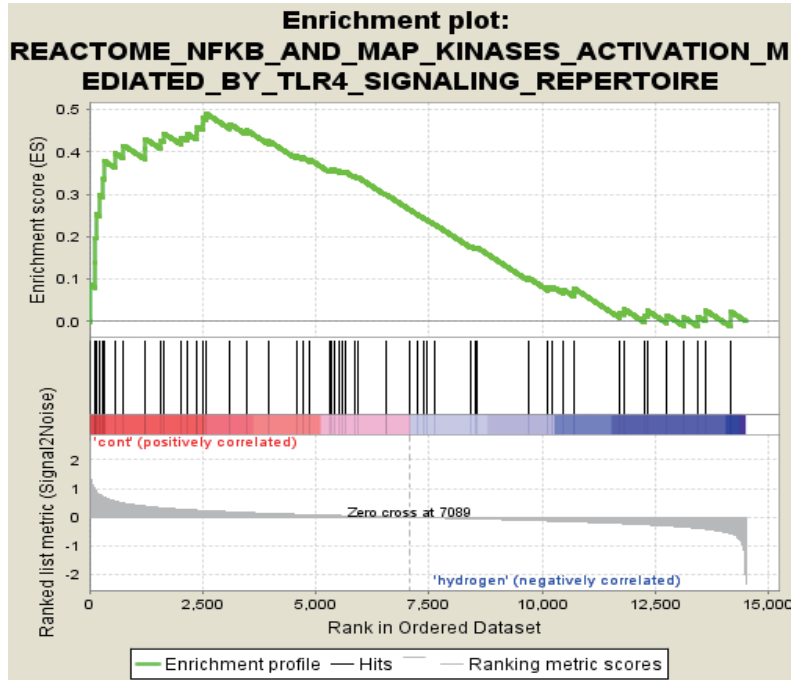

**B**

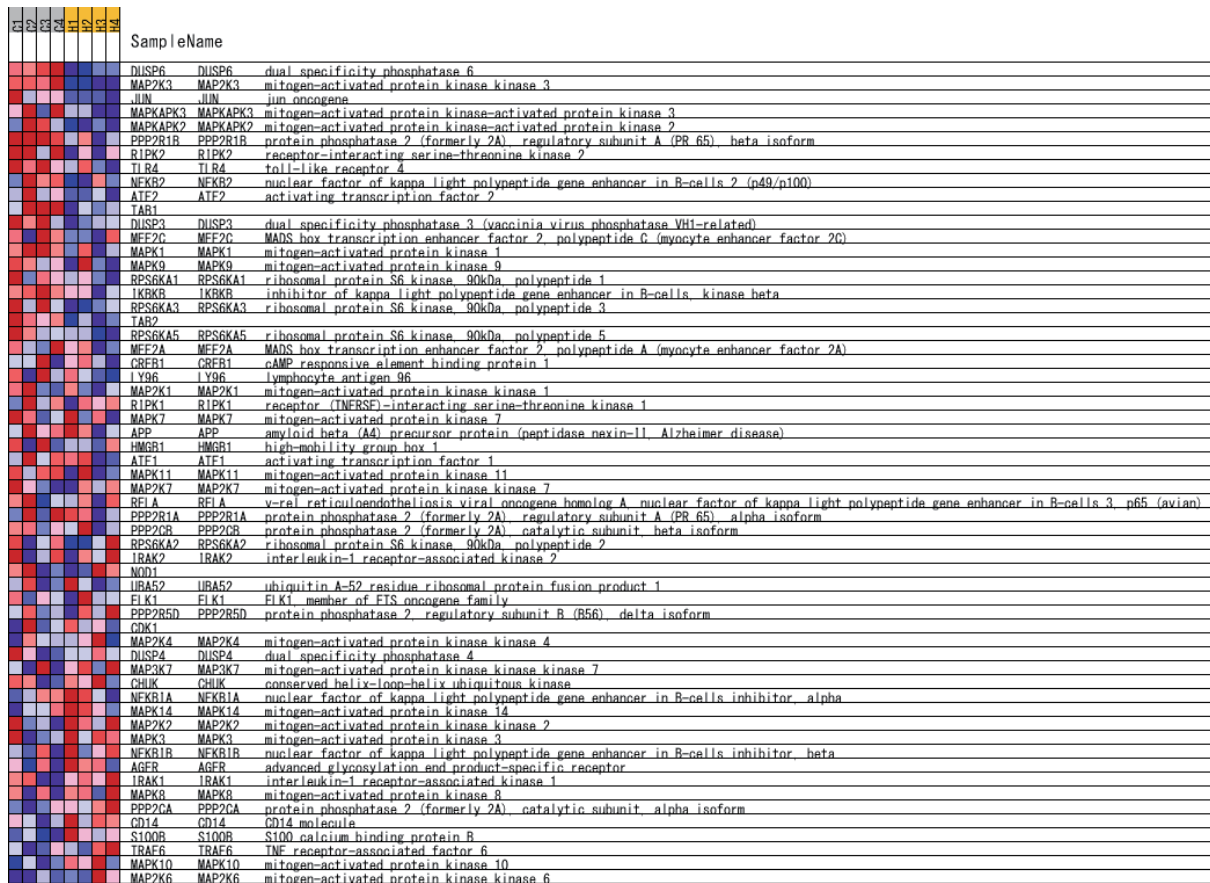

**Supplemental Fig. 5.**

**Enrichment plot and heat map for the gene set of the NF- $\kappa$ B and MAP kinases activation Reactome mediated by the Toll-like receptor (TLR) 4 signaling repertoire, generated by Gene Set Enrichment Analysis (GSEA).**

(A) Microarray results by Nakai et al. (Nakai et al. Biosci Biotechnol Biochem, 2011) were subjected to GSEA using Gene Set of Reactome (Reactome gene sets in C2 curated gene sets of default genes). Enrichment plot (A) and Heat map of the genes (B) within the gene set of the NF- $\kappa$ B and MAP kinases activation Reactome mediated by the TLR 4 signaling repertoire are shown. Normalized enrichment score (NES), normalized p-value and FDR q-value were 1.94, 0.0 and 0.033, respectively.



**Table S2. Sequences of primers and probes used in quantitative real-time PCR.**

| CYBR Green method |                               |                               |
|-------------------|-------------------------------|-------------------------------|
| Gene Symbol       | Forward primers               | Reverse primers               |
| Acta2             | 5'-TGCCGAGCGTGAGATTGTCC-3'    | 5'-GGTGATCACCTGCCCGTCAG-3'    |
| Actb              | 5'-CCCTGAAAAGATGACCCAGA-3'    | 5'-GTCTCCGGAGTCCATCACAA-3'    |
| Aoc3              | 5'-TTGTCCCACGATTGTACCTT-3'    | 5'-TGGCCAGGTACAGGTAGCG-3'     |
| BC013529          | 5'-AAAAGCGCTCTGTAGGTTCTG-3'   | 5'-GAGCCGTCTGGGTATAAGATG-3'   |
| Bcl6              | 5'-GGCACTCGTTCGGGCACCT-3'     | 5'-CCGACACGCGGTATTGCACCTT-3'  |
| Ctgf              | 5'-CACACCGCACAGAACCACCA-3'    | 5'-GGCAGGCACAGGTCTTGATGA-3'   |
| Cygb              | 5'-GCGGAGAGGAAGGCGTTTCAG-3'   | 5'-ATGACCCGGCAGGCGTGCTT-3'    |
| Cyp4a14           | 5'-GACCCCTCTAGATTTGCACC-3'    | 5'-TGGATCCCATTCTTGACTT-3'     |
| Cyr61             | 5'-CCTTCAGGACGCTCGTGTC-3'     | 5'-GTCTGCCTTCTGACTGAGCTCTG-3' |
| Dusp1             | 5'-CCTCTCTACGATCAGGGGG-3'     | 5'-CTGCCTGTGGTTGTCTC-3'       |
| Dysf              | 5'-TGTGAACCCCGTGTGGAATG-3'    | 5'-CCTGGGGGTGGCGTGTAG-3'      |
| Eil3              | 5'-AGCCTCTCAGCTCCATCAGCC-3'   | 5'-CCTGTTGCTGCTCTGTGCTGTG-3'  |
| Etv5              | 5'-TCCCCACCTCAGGCAACTC-3'     | 5'-ACATCTGCCGGTGGTAGCTGG-3'   |
| Fbln5             | 5'-TTCACCCTCAACGACGATGG-3'    | 5'-TCCTGGCAGCTTCGGTTATC-3'    |
| Fgf21             | 5'-CAGCACACCGCAGTCCAG-3'      | 5'-TCAGGATCAAAGTGAGGCGA-3'    |
| Fkbp14            | 5'-GCTCCCTGTTTCATTCCAATC-3'   | 5'-TTTTACCTTTTCTTTTCC-3'      |
| Foxk2             | 5'-GTGTTTCGTGGACGGGGTGT-3'    | 5'-GAGGTGGGCCATCGTGTCTG-3'    |
| Fyb               | 5'-CCACCACCTCCGCCTACA-3'      | 5'-CCCGTTTCTGTCTCGTTCC-3'     |
| G6pc              | 5'-AAGAGACTGTGGGCATCAA-3'     | 5'-AACACCGGAATCCATACG-3'      |
| Gdf15             | 5'-ACTCAACGCCGACGAGCTAC-3'    | 5'-GTGGGACCCCAATCTCACCT-3'    |
| Grap              | 5'-AGGATCTCTCGACAGCTGG-3'     | 5'-GCACCTGGTCACCATAATTC-3'    |
| Hif1a             | 5'-CAAGATCTCGGCGAAGCAA-3'     | 5'-GTCTAGACCACCGGCATCCA-3'    |
| Igfbp1            | 5'-ACCCGTGCCCGCTTCGTG-3'      | 5'-CCTGGGCGCAGCGAGCAG-3'      |
| Krt19             | 5'-CCCTCCCAGATTACAACCACT-3'   | 5'-TGCAGCCAGGCGAGCATT-3'      |
| Lrp5              | 5'-TGGTCCCCGCCGCGCCT-3'       | 5'-CAGCAGCTGCATCCTCCAGGCCAC   |
| Mapk7             | 5'-AAGCCTACTGTGCCCTATGGAGA-3' | 5'-TATTTGAGGCCCGAAGCAG-3'     |
| Nfatc2            | 5'-GCGGAAGGGCGAGACGGACA-3'    | 5'-CGCAGCCTGCAGGGAGACGA-3'    |
| Nle1              | 5'-GCGGCCGTGTACCAGATTGC-3'    | 5'-TCTTTCCCGCCGCTTGCTAC-3'    |
| P4ha2             | 5'-GCGGGCGGAGACTGTGACGA-3'    | 5'-GCACCCAGCTCAGGACACCGAA-3'  |
| Pdxk              | 5'-TCCTCACAGGGCAGCGACTA-3'    | 5'-AGAAGCATGGCAGCGAAGAG-3'    |
| Pfkfb3            | 5'-TCCTCCGAGACTCCGCACAA-3'    | 5'-CACGGTTGGGGAGTTGGTCA-3'    |
| Pim3              | 5'-AGTGGGGCAGTCTCGGCG-3'      | 5'-GGGCCGCTCGAACCAAGTC-3'     |
| Pkdcc             | 5'-CCGCCCTCCCTCCGACCTCT-3'    | 5'-GCCCGCGTGGTATAGGATG-3'     |
| Plk3              | 5'-GCTGGGCATCCTGCGGTATTT-3'   | 5'-GATTGCGGGCCACGAAGGTC-3'    |
| Sgk               | 5'-GAAGGATGGGCTGAACGAT-3'     | 5'-GTTTGGCGTGAGGGTTGGA-3'     |
| Sh3bp1            | 5'-CACGGGCAGCTCGGGACGCA-3'    | 5'-CCCCGCTTTGGCCCTGCAGAC-3'   |
| Sh3bp5l           | 5'-GCAGGGGGAACCTTCGGTC-3'     | 5'-GGTGGTCCTGGCCTCGTC-3'      |
| Smad7             | 5'-CCGGGGGAACGAATTATCTG-3'    | 5'-CCGATCTTGCTCCGCACTTT-3'    |
| Tnfsf8            | 5'-ACCTCAGCACCACCGCACT-3'     | 5'-TGGTGCCATCTTCGTTCCAT-3'    |
| Traf3             | 5'-GTAGGCCAGCAGCATCGTGT-3'    | 5'-AGGGCCACCTCGCATAGGAA-3'    |
| Traf7             | 5'-CTTCCGGCTCCTGTATCCTG-3'    | 5'-AAAGGTAGGCCCAAAGTTGT-3'    |
| Ucp1              | 5'-TCTGGGCTTAACGGGTCTCTC-3'   | 5'-TCGGAAGTTGTCGGGTTACAC-3'   |
| Usp2              | 5'-ACCGACCAAGTGGCCGTTAC-3'    | 5'-GCCGAGGTCCCGCATGTA-3'      |
| Wee1              | 5'-CCACGTCGTTTCGCTATTT-3'     | 5'-TTTGGGATTGAGGTTGAGA-3'     |
| Zfp672            | 5'-TGGTGGCGACAAGCGTTTCT-3'    | 5'-CAGCAGCGCAGGGACATGAG-3'    |

| Taqman probe method |               |
|---------------------|---------------|
| Gene Symbol         | Assay ID      |
| Actb                | Mm00607939_s1 |
| Bcor                | Mm00551516_m1 |
| Egr1                | Mm00656724_m1 |
| Ins2                | Mm00731595_gH |
| Itfg2               | Mm00505801_m1 |
| Ms4a5               | Mm00806060_m1 |
| Wnt3                | Mm00437336_m1 |

Table S3. DAVID Gene Ontology Analysis for down-regulated genes by H2 treatment

| Clustered annotations     |                                                                                     |                        |       |          |                 |         |
|---------------------------|-------------------------------------------------------------------------------------|------------------------|-------|----------|-----------------|---------|
| Annotation Cluster 1      |                                                                                     | Enrichment Score: 2.37 |       |          |                 |         |
| Category                  | Term                                                                                | Count                  | %     | PValue   | Fold Enrichment | FDR (%) |
| INTERPRO                  | Thrombospondin, type 1 repeat                                                       | 4                      | 0.36  | 3.65E-03 | 12.81           | 4.66    |
| PFAM                      | TSP_1                                                                               | 4                      | 0.36  | 3.81E-03 | 12.62           | 4.75    |
| UP_SEQ_FEATURE            | domain:TSP type-1                                                                   | 3                      | 0.27  | 3.87E-03 | 31.62           | 5.38    |
| SMART                     | TSP1                                                                                | 4                      | 0.36  | 6.15E-03 | 10.49           | 6.05    |
| Annotation Cluster 2      |                                                                                     | Enrichment Score: 1.97 |       |          |                 |         |
| Category                  | Term                                                                                | Count                  | %     | PValue   | Fold Enrichment | FDR (%) |
| PANTHER_PATHWAY           | PI3 kinase pathway                                                                  | 5                      | 0.44  | 3.76E-03 | 6.99            | 3.21    |
| PANTHER_PATHWAY           | Insulin/IGF pathway-mitogen activated protein kinase kinase/MAP kinase cascade      | 4                      | 0.36  | 5.01E-03 | 10.47           | 4.26    |
| PANTHER_PATHWAY           | Interleukin signaling pathway                                                       | 4                      | 0.36  | 6.42E-02 | 4.01            | 43.72   |
| Annotation Cluster 3      |                                                                                     | Enrichment Score: 1.90 |       |          |                 |         |
| Category                  | Term                                                                                | Count                  | %     | PValue   | Fold Enrichment | FDR (%) |
| INTERPRO                  | Insulin-like growth factor binding protein, N-terminal                              | 3                      | 0.27  | 1.45E-03 | 51.54           | 1.87    |
| INTERPRO                  | Insulin-like growth factor-binding protein, IGFBP                                   | 3                      | 0.27  | 4.38E-03 | 29.84           | 5.55    |
| PFAM                      | IGFBP                                                                               | 3                      | 0.27  | 4.50E-03 | 29.40           | 5.59    |
| UP_SEQ_FEATURE            | domain:IGFBP N-terminal                                                             | 3                      | 0.27  | 4.90E-03 | 28.11           | 6.76    |
| SMART                     | IB                                                                                  | 3                      | 0.27  | 6.33E-03 | 24.44           | 6.22    |
| GOTERM_MF_ALL             | insulin-like growth factor binding                                                  | 3                      | 0.27  | 6.77E-03 | 23.87           | 8.40    |
| GOTERM_MF_ALL             | growth factor binding                                                               | 3                      | 0.27  | 6.25E-02 | 7.29            | 56.58   |
| GOTERM_BP_ALL             | regulation of cell growth                                                           | 3                      | 0.27  | 1.05E-01 | 5.39            | 82.15   |
| GOTERM_BP_ALL             | regulation of growth                                                                | 4                      | 0.36  | 1.97E-01 | 2.58            | 96.73   |
| Annotation Cluster 4      |                                                                                     | Enrichment Score: 1.59 |       |          |                 |         |
| Category                  | Term                                                                                | Count                  | %     | PValue   | Fold Enrichment | FDR (%) |
| GOTERM_BP_ALL             | lipid metabolic process                                                             | 13                     | 1.15  | 8.49E-04 | 3.09            | 1.31    |
| GOTERM_BP_ALL             | oxoacid metabolic process                                                           | 9                      | 0.80  | 7.79E-03 | 3.11            | 11.47   |
| GOTERM_BP_ALL             | carboxylic acid metabolic process                                                   | 9                      | 0.80  | 7.79E-03 | 3.11            | 11.47   |
| GOTERM_BP_ALL             | organic acid metabolic process                                                      | 9                      | 0.80  | 7.89E-03 | 3.10            | 11.60   |
| GOTERM_BP_ALL             | cellular lipid metabolic process                                                    | 9                      | 0.80  | 8.08E-03 | 3.09            | 11.86   |
| GOTERM_BP_ALL             | cellular ketone metabolic process                                                   | 9                      | 0.80  | 8.98E-03 | 3.03            | 13.10   |
| GOTERM_BP_ALL             | monocarboxylic acid metabolic process                                               | 6                      | 0.53  | 2.22E-02 | 3.70            | 29.45   |
| GOTERM_BP_ALL             | fatty acid metabolic process                                                        | 5                      | 0.44  | 2.44E-02 | 4.49            | 31.94   |
| GOTERM_BP_ALL             | fatty acid biosynthetic process                                                     | 3                      | 0.27  | 8.45E-02 | 6.12            | 74.71   |
| GOTERM_MF_ALL             | ligase activity                                                                     | 5                      | 0.44  | 1.44E-01 | 2.44            | 86.64   |
| GOTERM_BP_ALL             | carboxylic acid biosynthetic process                                                | 3                      | 0.27  | 2.06E-01 | 3.52            | 97.25   |
| GOTERM_BP_ALL             | organic acid biosynthetic process                                                   | 3                      | 0.27  | 2.06E-01 | 3.52            | 97.25   |
| GOTERM_BP_ALL             | lipid biosynthetic process                                                          | 4                      | 0.36  | 2.43E-01 | 2.32            | 98.68   |
| Annotation Cluster 5      |                                                                                     | Enrichment Score: 1.32 |       |          |                 |         |
| Category                  | Term                                                                                | Count                  | %     | PValue   | Fold Enrichment | FDR (%) |
| GOTERM_CC_ALL             | cytoplasmic vesicle                                                                 | 8                      | 0.71  | 1.81E-02 | 2.94            | 19.71   |
| GOTERM_CC_ALL             | vesicle                                                                             | 8                      | 0.71  | 2.01E-02 | 2.88            | 21.65   |
| GOTERM_CC_ALL             | cytoplasmic membrane-bounded vesicle                                                | 6                      | 0.53  | 6.87E-02 | 2.70            | 57.54   |
| GOTERM_CC_ALL             | membrane-bounded vesicle                                                            | 6                      | 0.53  | 7.21E-02 | 2.66            | 59.36   |
| SP_PIR_KEYWORDS           | cytoplasmic vesicle                                                                 | 4                      | 0.36  | 1.35E-01 | 3.11            | 82.87   |
| Annotation Cluster 6      |                                                                                     | Enrichment Score: 1.31 |       |          |                 |         |
| Category                  | Term                                                                                | Count                  | %     | PValue   | Fold Enrichment | FDR (%) |
| GOTERM_BP_ALL             | embryonic development                                                               | 11                     | 0.98  | 6.51E-03 | 2.71            | 9.67    |
| GOTERM_BP_ALL             | central nervous system development                                                  | 8                      | 0.71  | 6.53E-03 | 3.58            | 9.69    |
| GOTERM_BP_ALL             | cell differentiation                                                                | 17                     | 1.51  | 2.24E-02 | 1.79            | 29.73   |
| GOTERM_BP_ALL             | nervous system development                                                          | 11                     | 0.98  | 3.07E-02 | 2.13            | 38.49   |
| GOTERM_BP_ALL             | cellular developmental process                                                      | 17                     | 1.51  | 3.17E-02 | 1.72            | 39.40   |
| GOTERM_BP_ALL             | developmental process                                                               | 24                     | 2.13  | 5.04E-02 | 1.45            | 55.31   |
| GOTERM_BP_ALL             | anatomical structure development                                                    | 20                     | 1.78  | 5.24E-02 | 1.52            | 56.70   |
| GOTERM_BP_ALL             | system development                                                                  | 18                     | 1.60  | 9.03E-02 | 1.47            | 77.07   |
| GOTERM_BP_ALL             | multicellular organismal development                                                | 21                     | 1.87  | 1.06E-01 | 1.38            | 82.55   |
| GOTERM_BP_ALL             | organ development                                                                   | 13                     | 1.15  | 2.88E-01 | 1.29            | 99.50   |
| GOTERM_BP_ALL             | multicellular organismal process                                                    | 27                     | 2.40  | 5.30E-01 | 1.03            | 100.00  |
| Annotation Cluster 7      |                                                                                     | Enrichment Score: 1.31 |       |          |                 |         |
| Category                  | Term                                                                                | Count                  | %     | PValue   | Fold Enrichment | FDR (%) |
| GOTERM_BP_ALL             | embryonic development                                                               | 11                     | 0.98  | 6.51E-03 | 2.71            | 9.67    |
| GOTERM_BP_ALL             | in utero embryonic development                                                      | 5                      | 0.44  | 7.59E-02 | 3.10            | 70.71   |
| GOTERM_BP_ALL             | chordate embryonic development                                                      | 6                      | 0.53  | 1.07E-01 | 2.36            | 82.95   |
| GOTERM_BP_ALL             | embryonic development ending in birth or egg hatching                               | 6                      | 0.53  | 1.11E-01 | 2.33            | 83.88   |
| Non-clustered annotations |                                                                                     |                        |       |          |                 |         |
| Category                  | Term                                                                                | Count                  | %     | PValue   | Fold Enrichment | FDR (%) |
| GOTERM_MF_ALL             | protein binding                                                                     | 48                     | 47.52 | 1.66E-03 | 1.44            | 2.12    |
| BIOCARTA                  | CD40L Signaling Pathway                                                             | 3                      | 2.97  | 2.32E-03 | 33.78           | 1.67    |
| BIOCARTA                  | TNFR2 Signaling Pathway                                                             | 3                      | 2.97  | 3.99E-03 | 25.83           | 2.86    |
| GOTERM_BP_ALL             | cellular process                                                                    | 68                     | 67.33 | 4.15E-03 | 1.22            | 6.27    |
| BIOCARTA                  | Control of skeletal myogenesis by HDAC & calcium/calmodulin-dependent kinase (CaMK) | 3                      | 2.97  | 4.99E-03 | 23.11           | 3.56    |
| GOTERM_MF_ALL             | binding                                                                             | 76                     | 75.25 | 5.32E-03 | 1.16            | 6.66    |
| GOTERM_BP_ALL             | response to protein stimulus                                                        | 4                      | 3.96  | 1.52E-02 | 7.60            | 21.26   |
| GOTERM_MF_ALL             | transcription factor binding                                                        | 6                      | 5.94  | 2.35E-02 | 3.65            | 26.49   |
| GOTERM_CC_ALL             | cytosol                                                                             | 8                      | 7.92  | 2.63E-02 | 2.72            | 27.43   |
| KEGG_PATHWAY              | Adipocytokine signaling pathway                                                     | 3                      | 2.97  | 6.24E-02 | 7.14            | 48.79   |
| GOTERM_BP_ALL             | steroid metabolic process                                                           | 4                      | 3.96  | 7.19E-02 | 4.11            | 68.71   |
| KEGG_PATHWAY              | MAPK signaling pathway                                                              | 5                      | 4.95  | 7.59E-02 | 3.01            | 55.91   |
| KEGG_PATHWAY              | PPAR signaling pathway                                                              | 3                      | 2.97  | 8.32E-02 | 6.05            | 59.40   |
| PANTHER_PATHWAY           | Insulin/IGF pathway-protein kinase B signaling cascade                              | 3                      | 2.97  | 8.93E-02 | 5.60            | 55.53   |
